# Supplementary material for: NPC1L1 Facilitates Sphingomyelin Absorption and Regulates Diet-Induced Production of VLDL/LDL-associated S1P
Source: PubMed Central journal article supplement (PMC7551898; doi:10.3390/nu12092641), 2020-08-30
Supplement: nutrients-12-02641-s001.pdf [file nutrients-12-02641-s001.pdf]

**Table S1. UPLC-MS/MS conditions.** The UPLC-MS/MS conditions to determine sphingosine-1-phosphate (S1P) amounts.

| <b>Compounds</b>                            | <b>Retention Time</b> | <b>Detection Conditions</b>                                                                    | <b>Elution Condition</b>                                 |           |           |
|---------------------------------------------|-----------------------|------------------------------------------------------------------------------------------------|----------------------------------------------------------|-----------|-----------|
| <b>S1P</b>                                  | 4.14 [min]            | Parent Mass : 380.38<br>Daughter Mass : 264.22<br>Cone Voltage : 20V<br>Collision Energy : 15V | <b>Solvent A</b> : water<br>with 0.1% formic acid        |           |           |
|                                             |                       |                                                                                                | <b>Solvent B</b> : Acetonitrile<br>with 0.1% formic acid |           |           |
|                                             |                       |                                                                                                | <b>Flow Rate</b> : 0.3 [mL/min]                          |           |           |
| <b>Pioglitazone<br/>(internal standard)</b> | 3.01 [min]            | Parent Mass : 357.15<br>Daughter Mass : 134.0<br>Cone Voltage : 28V<br>Collision Energy : 16V  | <b>Elution Method</b>                                    |           |           |
|                                             |                       |                                                                                                | Time                                                     | Solvent A | Solvent B |
|                                             |                       |                                                                                                | [min]                                                    | [%]       | [%]       |
|                                             |                       |                                                                                                | 0                                                        | 100       | 0         |
|                                             |                       |                                                                                                | 1                                                        | 100       | 0         |
|                                             |                       |                                                                                                | 3.5                                                      | 2         | 98        |
|                                             |                       |                                                                                                | 5.0                                                      | 2         | 98        |
| 5.1                                         | 100                   | 0                                                                                              |                                                          |           |           |
